# Supplementary material
Source: ML conference proceedings conference paper supplement (https://openreview.net/forum?id=0Ij9_q567Ma)
Supplement: supplementary_material [file attachment]

## A PROOF

**Lemma 1.** The binary relation  $\preceq_{(Z)}$  defined in Eq. (7) is transitive, i.e.,  $\forall \mathbf{x}, \mathbf{y}, \mathbf{w} \in X$ ,  $F(\mathbf{x}) \preceq_{(Z)} F(\mathbf{y}) \wedge F(\mathbf{y}) \preceq_{(Z)} F(\mathbf{w}) \Rightarrow F(\mathbf{x}) \preceq_{(Z)} F(\mathbf{w})$ .

*Proof of Lemma 1.* According to Eq. (7),

$$\begin{aligned}
 & F(\mathbf{x}) \preceq_{(Z)} F(\mathbf{y}) \wedge F(\mathbf{y}) \preceq_{(Z)} F(\mathbf{w}) \Rightarrow \\
 & (F(\mathbf{x}) \prec_{(Z)} F(\mathbf{y}) \vee F(\mathbf{x}) =_{(Z)} F(\mathbf{y})) \wedge (F(\mathbf{y}) \prec_{(Z)} F(\mathbf{w}) \vee F(\mathbf{y}) =_{(Z)} F(\mathbf{w})) \Rightarrow \\
 & \underbrace{(F(\mathbf{x}) =_{(Z)} F(\mathbf{y}) \wedge F(\mathbf{y}) =_{(Z)} F(\mathbf{w}))}_i \vee \underbrace{(F(\mathbf{x}) \prec_{(Z)} F(\mathbf{y}) \wedge F(\mathbf{y}) \prec_{(Z)} F(\mathbf{w}))}_{ii} \\
 & \vee \underbrace{(F(\mathbf{x}) =_{(Z)} F(\mathbf{y}) \wedge F(\mathbf{y}) \prec_{(Z)} F(\mathbf{w}))}_{iii} \vee \underbrace{(F(\mathbf{x}) \prec_{(Z)} F(\mathbf{y}) \wedge F(\mathbf{y}) =_{(Z)} F(\mathbf{w}))}_{iv}
 \end{aligned} \tag{9}$$

**Statement I:**  $F(\mathbf{x}) =_{(Z)} F(\mathbf{y}) \wedge F(\mathbf{y}) =_{(Z)} F(\mathbf{w}) \Rightarrow F(\mathbf{x}) =_{(Z)} F(\mathbf{w})$ .

*Proof of Statement I.* From Eq. (5), we have,

$$\begin{aligned}
 & F(\mathbf{x}) =_{(Z)} F(\mathbf{y}) \wedge F(\mathbf{y}) =_{(Z)} F(\mathbf{w}) \Rightarrow \\
 & (f^k(\mathbf{x}) = f^k(\mathbf{y}) \vee (f^k(\mathbf{x}) \leq z^k \wedge f^k(\mathbf{y}) \leq z^k), \forall k \in [K]) \\
 & \wedge (f^k(\mathbf{y}) = f^k(\mathbf{w}) \vee (f^k(\mathbf{y}) \leq z^k \wedge f^k(\mathbf{w}) \leq z^k), \forall k \in [K]) \\
 & \Rightarrow \forall k \in [K] : (f^k(\mathbf{x}) = f^k(\mathbf{y}) = f^k(\mathbf{w})) \\
 & \vee ((f^k(\mathbf{x}) = f^k(\mathbf{y})) \wedge (f^k(\mathbf{y}) \leq z^k \wedge f^k(\mathbf{w}) \leq z^k)) \\
 & \vee ((f^k(\mathbf{x}) \leq z^k \wedge f^k(\mathbf{y}) \leq z^k) \wedge (f^k(\mathbf{y}) = f^k(\mathbf{w}))) \\
 & \vee (f^k(\mathbf{x}) \leq z^k \wedge f^k(\mathbf{y}) \leq z^k \wedge f^k(\mathbf{w}) \leq z^k) \\
 & \Rightarrow ((f^k(\mathbf{x}) = f^k(\mathbf{w})) \vee (f^k(\mathbf{x}) \leq z^k \wedge f^k(\mathbf{w}) \leq z^k), \forall k \in [K]) \\
 & \Rightarrow F(\mathbf{x}) =_{(Z)} F(\mathbf{w})
 \end{aligned} \tag{10}$$

**Statement II:**  $F(\mathbf{x}) \prec_{(Z)} F(\mathbf{y}) \wedge F(\mathbf{y}) \prec_{(Z)} F(\mathbf{w}) \Rightarrow F(\mathbf{x}) \prec_{(Z)} F(\mathbf{w})$

*Proof of Statement II.* According to Eq. (5), we have

$$\begin{aligned}
 & F(\mathbf{x}) \prec_{(Z)} F(\mathbf{y}) \Leftrightarrow \\
 & \exists k_1 \in [K] : f^{k_1}(\mathbf{x}) < f^{k_1}(\mathbf{y}) \wedge f^{k_1}(\mathbf{y}) > z^{k_1} \wedge F^{k_1-1}(\mathbf{x}) =_{(Z)} F^{k_1-1}(\mathbf{y}) \\
 & F(\mathbf{y}) \prec_{(Z)} F(\mathbf{w}) \Leftrightarrow \\
 & \exists k_2 \in [K] : f^{k_2}(\mathbf{y}) < f^{k_2}(\mathbf{w}) \wedge f^{k_2}(\mathbf{w}) > z^{k_2} \wedge F^{k_2-1}(\mathbf{y}) =_{(Z)} F^{k_2-1}(\mathbf{w})
 \end{aligned} \tag{11}$$

Let  $k' = \min\{k_1, k_2\}$ , according to Statement I and Eq. (11), we have:

$$(F^{k'-1}(\mathbf{x}) =_{(Z)} F^{k'-1}(\mathbf{y})) \wedge (F^{k'-1}(\mathbf{y}) =_{(Z)} F^{k'-1}(\mathbf{w})) \Rightarrow F^{k'-1}(\mathbf{x}) =_{(Z)} F^{k'-1}(\mathbf{w}) \tag{12}$$

According to Eq. (12), if  $k' = k_1 < k_2$ , we have

$$(f^{k'}(\mathbf{x}) < f^{k'}(\mathbf{y}) = f^{k'}(\mathbf{w})) \wedge (z^{k'} < f^{k'}(\mathbf{y}) = f^{k'}(\mathbf{w})) \tag{13}$$

If  $k' = k_2 < k_1$ , we have

$$(f^{k'}(\mathbf{x}) = f^{k'}(\mathbf{y}) < f^{k'}(\mathbf{w})) \wedge (z^{k'} < f^{k'}(\mathbf{w})) \tag{14}$$

Otherwise when  $k' = k_1 = k_2$ , we have

$$\left(f^{k'}(\mathbf{x}) < f^{k'}(\mathbf{y}) < f^{k'}(\mathbf{w})\right) \wedge \left(z^{k'} < f^{k'}(\mathbf{y}) < f^{k'}(\mathbf{w})\right) \quad (15)$$

Combing Eq. (12), Eq. (13), Eq. (14) and Eq. (15), we have found  $k = k'$  such that  $(f^k(\mathbf{x}) < f^k(\mathbf{w})) \wedge (f^k(\mathbf{w}) > z^k) \wedge (F^{k-1}(\mathbf{x}) =_{(Z)} F^{k-1}(\mathbf{w}))$ .

**Statement III:**  $F(\mathbf{x}) =_{(Z)} F(\mathbf{y}) \wedge F(\mathbf{y}) \prec_{(Z)} F(\mathbf{w}) \Rightarrow F(\mathbf{x}) \prec_{(Z)} F(\mathbf{w})$ .

*Proof of Statement III.* According to the definitions of  $=_{(Z)}$  and  $\prec_{(Z)}$  in Eq. (5) and Eq. (6),

$$\begin{aligned} & \left(F(\mathbf{x}) =_{(Z)} F(\mathbf{y})\right) \wedge \left(F(\mathbf{y}) \prec_{(Z)} F(\mathbf{w})\right) \Rightarrow \\ & \left(\forall k_1 \in [K] : (f^{k_1}(\mathbf{x}) = f^{k_1}(\mathbf{y})) \vee (f^{k_1}(\mathbf{x}) \leq z^{k_1} \wedge f^{k_1}(\mathbf{y}) \leq z^{k_1})\right) \\ & \wedge \left(\exists k_2 \in [K] : f^{k_2}(\mathbf{y}) < f^{k_2}(\mathbf{w}) \wedge f^{k_2}(\mathbf{w}) > z^{k_2} \wedge F^{k_2-1}(\mathbf{y}) =_{(Z)} F^{k_2-1}(\mathbf{w})\right) \end{aligned} \quad (16)$$

According to the above propositions, we find a  $k = k_2$ , such that,

$$\begin{aligned} & \left((f^k(\mathbf{x}) = f^k(\mathbf{y}) < f^k(\mathbf{w})) \vee (f^k(\mathbf{x}) \leq z^k < f^k(\mathbf{w}))\right) \\ & \wedge \left(z^k < f^k(\mathbf{w})\right) \wedge \left(F^{k-1}(\mathbf{x}) =_{(Z)} F^{k-1}(\mathbf{w})\right) \\ & \Rightarrow \left(f^k(\mathbf{x}) < f^k(\mathbf{w})\right) \wedge \left(z^k < f^k(\mathbf{w})\right) \wedge \left(F^{k-1}(\mathbf{x}) =_{(Z)} F^{k-1}(\mathbf{w})\right) \end{aligned} \quad (17)$$

in which indicates  $F(\mathbf{x}) \prec_{(Z)} F(\mathbf{w})$ .

**Statement IV:**  $F(\mathbf{x}) \prec_{(Z)} F(\mathbf{y}) \wedge F(\mathbf{y}) =_{(Z)} F(\mathbf{w}) \Rightarrow F(\mathbf{x}) \prec_{(Z)} F(\mathbf{w})$ .

*Proof of Statement IV.* According to the definitions of  $=_{(Z)}$  and  $\prec_{(Z)}$  in Eq. (5) and Eq. (6),

$$\begin{aligned} & \left(F(\mathbf{x}) \prec_{(Z)} F(\mathbf{y})\right) \wedge \left(F(\mathbf{y}) =_{(Z)} F(\mathbf{w})\right) \\ & \Rightarrow \left(\exists k_1 \in [K] : f^{k_1}(\mathbf{x}) < f^{k_1}(\mathbf{y}) \wedge f^{k_1}(\mathbf{y}) > z^{k_1} \wedge F^{k_1-1}(\mathbf{x}) =_{(Z)} F^{k_1-1}(\mathbf{y})\right) \wedge \\ & \left(\forall k_2 \in [K] : (f^{k_2}(\mathbf{y}) = f^{k_2}(\mathbf{w})) \vee (f^{k_2}(\mathbf{y}) \leq z^{k_2} \wedge f^{k_2}(\mathbf{w}) \leq z^{k_2})\right) \end{aligned} \quad (18)$$

Then, we can find a  $k = k_1$ , such that,

$$\begin{aligned} & \left(f^k(\mathbf{x}) < f^k(\mathbf{y}) = f^k(\mathbf{w})\right) \wedge \left(z^k < f^k(\mathbf{w}) = f^k(\mathbf{y})\right) \wedge \left(F^{k-1}(\mathbf{x}) =_{(Z)} F^{k-1}(\mathbf{w})\right) \\ & \Rightarrow \left(f^k(\mathbf{x}) < f^k(\mathbf{w})\right) \wedge \left(z^k < f^k(\mathbf{w})\right) \wedge \left(F^{k-1}(\mathbf{x}) =_{(Z)} F^{k-1}(\mathbf{w})\right) \Rightarrow F(\mathbf{x}) \prec_{(Z)} F(\mathbf{w}) \end{aligned} \quad (19)$$

By substituting the conclusions in statement (I), (II), (III) and (IV) into (i), (ii), (iii), and (iv) in Eq. (9) respectively, we get:

$$\begin{aligned} F(\mathbf{x}) \preceq_{(Z)} F(\mathbf{y}) \wedge F(\mathbf{y}) \preceq_{(Z)} F(\mathbf{w}) & \Rightarrow \left(F(\mathbf{x}) \prec_{(Z)} F(\mathbf{w})\right) \vee \left(F(\mathbf{x}) =_{(Z)} F(\mathbf{w})\right) \\ & \Rightarrow F(\mathbf{x}) \preceq_{(Z)} F(\mathbf{w}) \end{aligned} \quad (20)$$

which concludes the proof.  $\square$

## B SUPPLEMENTARY RESULTS

### B.1 FEATURE SELECTION IN BIOINFORMATICS

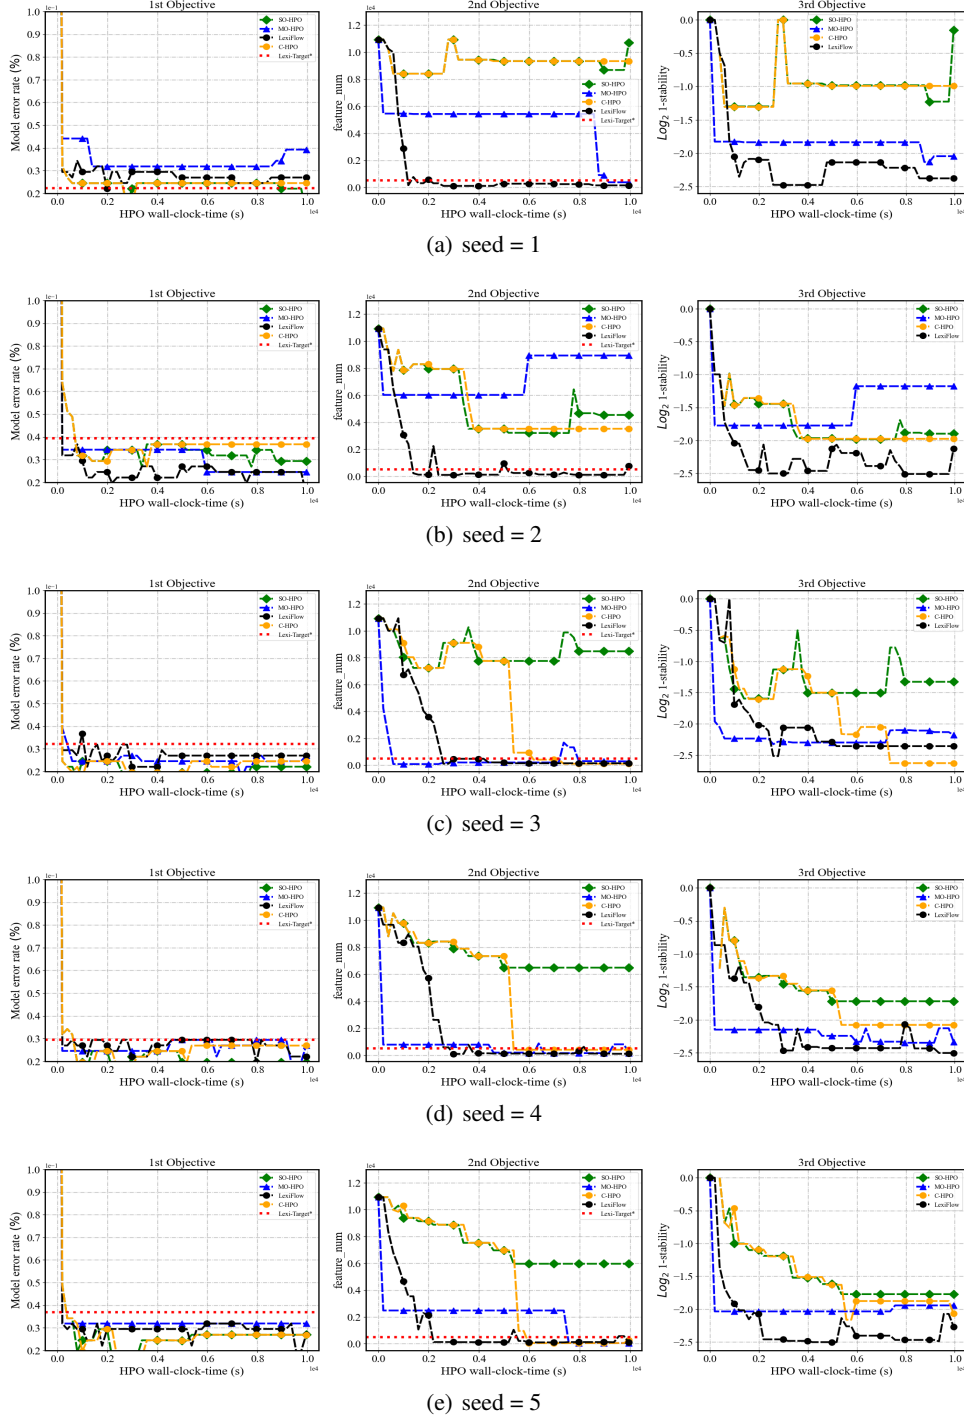

Figure 4: The detailed results in tuning Xgboost on biological dataset AP\_Colon\_Kidney

## C EXPERIMENTATION DETAILS

### C.1 DETAILED SEARCH SPACE

The detailed search space of the hyperparameters in tuning Neural Networks, Xgboost and Random Forest.

Table 3: Hyperparameters tuned in Random Forest

| hyperparameter    | type  | range                                              |
|-------------------|-------|----------------------------------------------------|
| max features      | float | $[\min(0.1, 1/\sqrt{\text{data\_features}}), 1.0]$ |
| estimators number | int   | $[4, \min(2048, \text{train\_datasize})]$          |
| max leaves        | int   | $[4, \text{train\_size}]$                          |

Table 4: Hyperparameters tuned in XGboost

| hyperparameter     | type  | range                                      |
|--------------------|-------|--------------------------------------------|
| estimators number  | int   | $[4, \min(32768, \text{train\_datasize})]$ |
| max leaves         | int   | $[4, \min(32768, \text{train\_datasize})]$ |
| max depth          | int   | $[0, 6, 12]$                               |
| min child weight   | float | $[0.001, 128]$                             |
| learning rate      | float | $[1/1024, 1.0]$                            |
| subsample          | float | $[0.1, 1.0]$                               |
| colsample by tree  | float | $[0.01, 1.0]$                              |
| colsample by level | float | $[0.01, 1.0]$                              |
| reg alpha          | float | $[1/1024, 1024]$                           |
| reg lambda         | float | $[1/1024, 1024]$                           |

Table 5: Hyperparameters tuned in Neural Network

| hyperparameter             | type  | range          |
|----------------------------|-------|----------------|
| epoch num                  | int   | $[1, 20]$      |
| layer num                  | int   | $[1, 3]$       |
| hidden units num per layer | int   | $[4, 128]$     |
| dropout value per layer    | float | $[0.2, 0.5]$   |
| learning rate per layer    | float | $[1e-5, 1e-1]$ |

### C.2 DETAILED DATASETS INFORMATIONS IN TABLE 2

Table 6: Date statistics information

| Dataset statistics       | Gisette | Christine | Scene | Ionsphere | Ginal_prior | Ginal_agnostic | Bioresponse | Hiva_agnostic | Madelon |
|--------------------------|---------|-----------|-------|-----------|-------------|----------------|-------------|---------------|---------|
| # of train instance      | 4900    | 4063      | 1805  | 263       | 2601        | 2601           | 2813        | 3171          | 1950    |
| # of val instance        | 2098    | 1355      | 602   | 88        | 867         | 867            | 938         | 1058          | 650     |
| # full feature dimension | 5000    | 1636      | 299   | 34        | 784         | 970            | 1776        | 1617          | 500     |

Are datasets used in Section 4.2 are available in Openml <https://www.openml.org/>.
